# Supplementary material for: Human iPS cell model of type 3 long QT syndrome recapitulates drug-based phenotype correction
Source: PubMed Central journal article supplement (PMC4724360; doi:10.1007/s00395-016-0530-0), 2016-01-23
Supplement: 395_2016_530_MOESM7_ESM.pdf [file 395_2016_530_MOESM7_ESM.pdf]

| ID   | Age<br>Gender | Symptoms<br>Age at first<br>occurrence | Therapy and device implantation<br>BB ( $\beta$ -blocker)<br>AA (Class I antiarrhythmic drugs)                                                                                                    | Basal<br>QTc<br>(ms) | QTc during<br>therapy<br>(ms) | $\Delta$ QTc<br>(ms) |
|------|---------------|----------------------------------------|---------------------------------------------------------------------------------------------------------------------------------------------------------------------------------------------------|----------------------|-------------------------------|----------------------|
| 5-1  | 58<br>female  | Syncope<br>29J                         | 1986-2006: BB (metoprolol, 2x50 mg)<br>1994: pacemaker implantation due to<br>bradycardia and orthostatic intolerance<br>Since 2006: AA (phenytoin, 1x50 mg<br>alternatively mexiletine, 2x50 mg) | 531                  | 485 (AA)                      | <b>46</b>            |
| 5-3  | 23<br>female  |                                        | Before 2006: BB (bisoprolol)<br>2006-2011: AA (mexiletine, 2x100 mg)<br>Since 2011: BB (bisoprolol, 2x 1.25 mg)<br>+ AA (phenytoin, 2x50 mg)                                                      | 507                  | 440 (AA)                      | <b>67</b>            |
| 5-7  | 63<br>female  | Syncope<br>12J                         | 1990-1998: BB (metoprolol 3x 50 mg)<br>Since 1998: AA (mexiletine, 3x 50 mg)                                                                                                                      | 502                  | 460 (AA+BB)                   | <b>42</b>            |
| 5-9  | 38<br>male    |                                        | None                                                                                                                                                                                              | 424                  |                               |                      |
| 5-10 | 42<br>female  | Syncope<br>27J                         | 1990-1993: BB (metoprolol)<br>2003-2006: BB (propranolol)<br>Since 2006 AA (mexiletine, 2x 50 mg)                                                                                                 | 531                  | 461 (AA)                      | <b>70</b>            |
| 5-11 | 35<br>female  |                                        | Since 2004: BB (propranolol)<br>2004: AA (mexiletine, 2x 50 mg)                                                                                                                                   | N/A                  | 426 (AA+BB)                   |                      |
| 5-12 | 25<br>female  |                                        | N/A                                                                                                                                                                                               | 460                  |                               |                      |
| 5-20 | 59<br>male    |                                        | BB (metoprolol, 2x50 mg)                                                                                                                                                                          | 480                  | 460 (BB)                      | <b>20</b>            |
| 5-22 | 42<br>female  | Syncope<br>33J                         | 2005-2006: BB, orthostatic intolerance<br>AA (mexiletine): not tolerated<br>2010: defibrillator implantation                                                                                      | 489                  | 476 (BB)                      | <b>13</b>            |
| 5-23 | 57<br>female  |                                        | Since 2001: BB                                                                                                                                                                                    | 462                  | N/A                           |                      |
| 5-26 | 30<br>female  | Syncope<br>15J                         | Since 2000: BB (metoprolol 3x50 mg)                                                                                                                                                               | 479                  | 460 (BB)                      | <b>19</b>            |
| 5-27 | 56<br>female  | Syncope<br>27J                         | Before 2006: BB<br>Since 2006: AA (phenytoin, 2x50 mg)                                                                                                                                            | 504                  | 418 (AA)                      | <b>86</b>            |
| 5-47 | 10<br>female  |                                        | N/A                                                                                                                                                                                               | 450                  | N/A                           |                      |
| 5-49 | 12<br>male    |                                        | N/A                                                                                                                                                                                               | 469                  | N/A                           |                      |
| 5-50 | 11<br>female  |                                        | N/A                                                                                                                                                                                               | 410                  | N/A                           |                      |

**Table S1** Overview of available clinical data of LQT3 mutation carriers in the family underlying this study. The drug dosages are indicating daily medication. The hiPSCs used in this study were we derived from patient #5-3. BB:  $\beta$ -blocker. AA: antiarrhythmic drug. N/A: not available.
